# Supplementary material for: Apico-basal cell compression regulates Lamin A/C levels in epithelial tissues
Source: PubMed Central journal article supplement (PMC7994818; doi:10.1038/s41467-021-22010-9), 2021-03-25
Supplement: 41467_2021_22010_MOESM1_ESM.pdf [file 41467_2021_22010_MOESM1_ESM.pdf]

1           **Apico-basal cell compression regulates Lamin A/C levels in**  
2                                           **Epithelial tissues**

3           K Venkatesan Iyer<sup>1,3,#,\*</sup>, Anna Taubenberger<sup>4</sup>, Salma Ahmed Zeidan<sup>1</sup>, Natalie A. Dye<sup>1,2</sup>,  
4                                           Suzanne Eaton<sup>1,2,†</sup>, Frank Jülicher<sup>2,3,5,\*</sup>

5  
6           <sup>1</sup>Max Planck Institute of Molecular Cell Biology and Genetics, Pfotenhauerstr. 108, Dresden,Germany

7                                   <sup>2</sup>Cluster of Excellence Physics of Life, TU Dresden, 01062 Dresden, Germany

8           <sup>3</sup>Max Planck Institute for Physics of Complex Systems, Nöthnitzerstr. 38, 01138, Dresden,Germany

9                                   <sup>4</sup>Biotechnology Center TU Dresden, Tatzberg 47-49, 01307 Dresden,Germany

10                                   <sup>5</sup>Center for Systems Biology Dresden, Pfotenhauerstr.108, Dresden,Germany

11           #Present Address: Mechanical Engineering Department, Indian Institute of Science, 560012, Bangalore, India

12  
13  
14                                   **Supplementary Information**

15

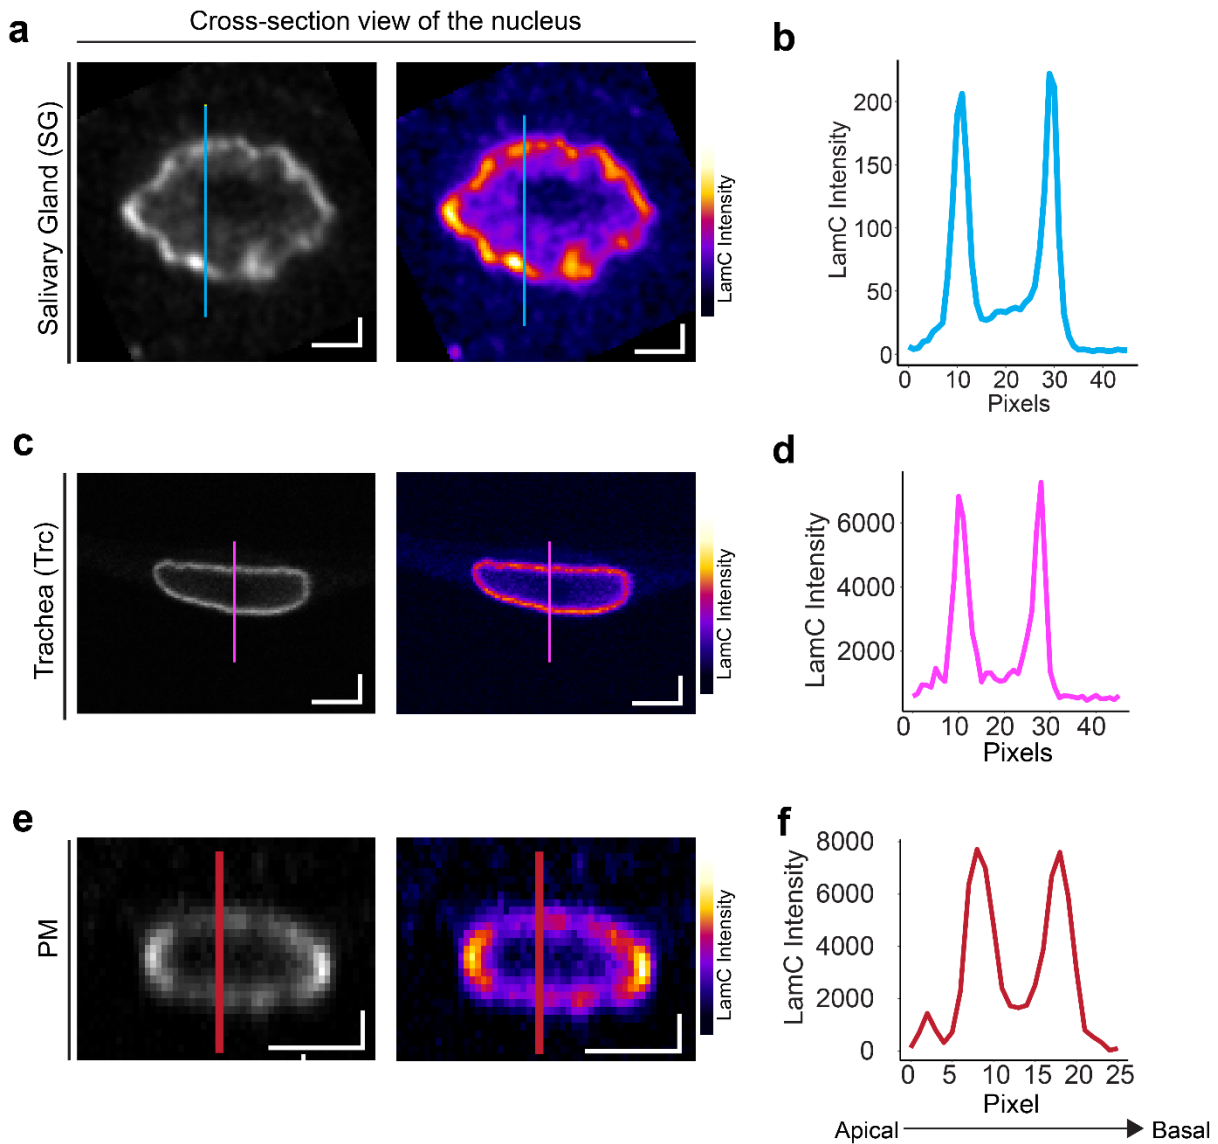

16

17 **Supplementary Fig 1: LamC is uniformly distributed along the apical and basal axis of**  
 18 **the nucleus. (a)** Grayscale and color-coded images of cross-section view of the nucleus of  
 19 Salivary Gland. **(b)** Line profile of LamC along the blue line shown in (a). **(c)** Grayscale and  
 20 color-coded images of cross section view of the nucleus of Trachea **(d)** Line profile of LamC  
 21 along the magenta line shown in (c). **(e)** Grayscale and color-coded images of cross-section  
 22 view of the nucleus of peripodial membrane **(f)** Line profile of LamC along the dark red line  
 23 shown in (e). Vertical and horizontal scale bar, 5  $\mu\text{m}$

24

25

Lamin B isoform, Lamin DM<sub>0</sub> is uniformly expressed in *Drosophila* epithelial tissues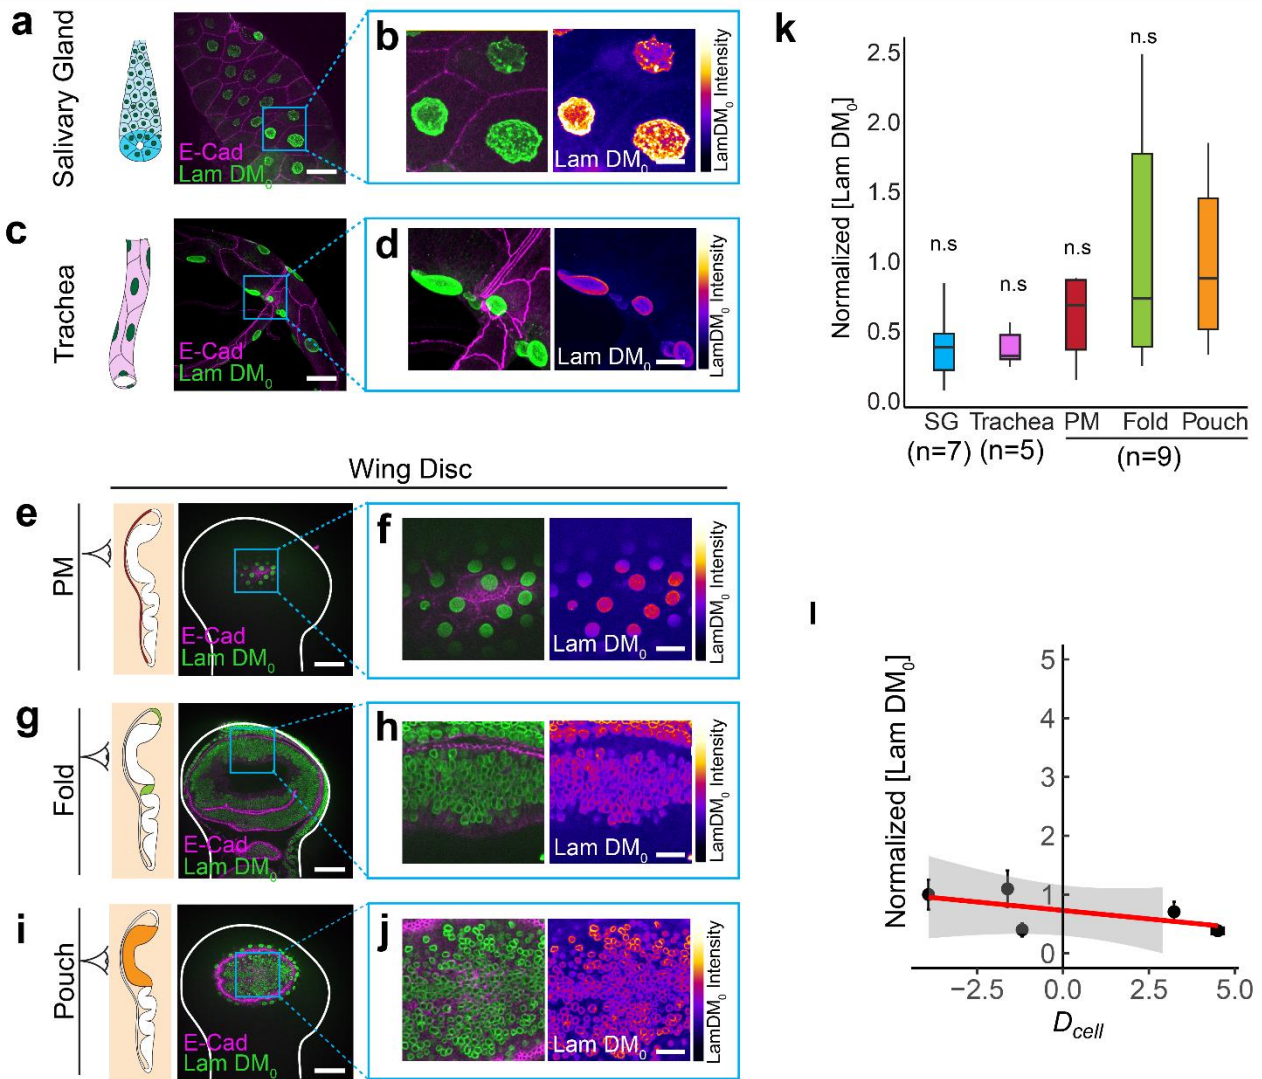

## SUN-domain proteins of the LINC complex are expressed uniformly in the wing disc

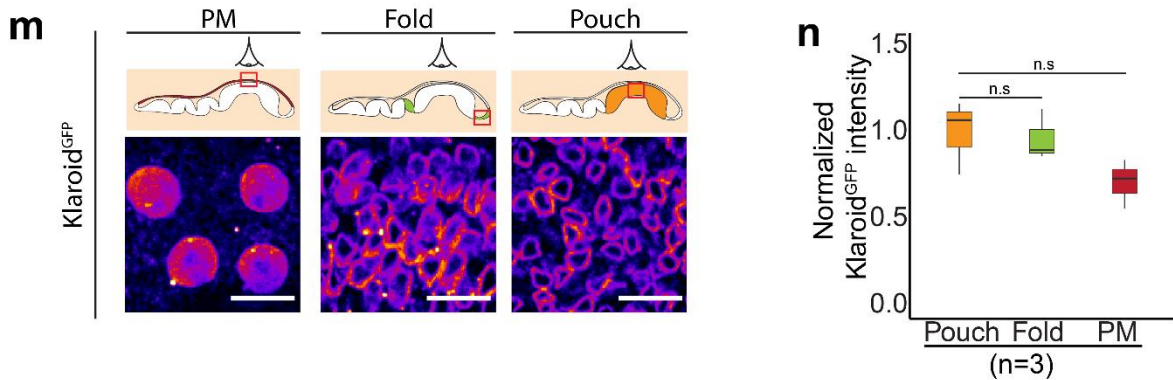

27 **Supplementary Fig. 2: Lamin DM<sub>0</sub> is and SUN domain proteins are similarly expressed**  
 28 **in epithelial tissues.** (a) Image showing E-Cad (magenta) and LamDM<sub>0</sub> (green) in salivary  
 29 gland. (b) Enlarged image of the region marked by blue ROI in (a). Left panel shows the merge

30 of E-Cad and LamDM<sub>0</sub>. Right panel shows LamDM<sub>0</sub> color coded for intensity. **(c)** Image  
31 showing E-Cad (magenta) and LamDM<sub>0</sub> (green) in trachea. **(d)** Enlarged image of the region  
32 marked by blue ROI in (c). Left panel shows the merge of E-Cad and Lam DM<sub>0</sub>. Right panel  
33 shows LamDM<sub>0</sub> color coded for intensity. **(e)** Image showing E-Cad (magenta) and LamDM<sub>0</sub>  
34 (green) in wing disc PM. **(f)** Enlarged image of the region marked by blue ROI in (e). Left panel  
35 shows the merge of E-Cad and LamDM<sub>0</sub>. Right panel shows LamDM<sub>0</sub> color coded for intensity.  
36 **(g)** Image showing E-Cad (magenta) and LamDM<sub>0</sub> (green) in wing disc fold. **(h)** Enlarged  
37 image of the region marked by blue ROI in (g). Left panel shows the merge of E-Cad and  
38 LamDM<sub>0</sub>. Right panel shows LamDM<sub>0</sub> color coded for intensity. **(i)** Image showing E-Cad  
39 (magenta) and LamDM<sub>0</sub> (green) in wing disc pouch. **(j)** ) Enlarged image of the region marked  
40 by blue ROI in (i). Left panel shows the merge of E-Cad and LamDM<sub>0</sub>. Right panel shows  
41 LamDM<sub>0</sub> color coded for intensity. **(k)** Box plot showing the normalized LamDM<sub>0</sub> levels in  
42 different *Drosophila* tissues. Normalization is performed with respect to wing disc pouch. The  
43 sample *n* biologically independent tissue samples **(l)** Scatter plot between  $D_{cell}$  and normalized  
44 LamDM<sub>0</sub>. Data are represented as mean values  $\pm$  S.E.M. **(m)** Images showing SUN domain  
45 protein Klaroid<sup>GFP</sup> (Koi) in different regions of the wing disc. **(n)** Box-plot showing the  
46 normalized Klaroid<sup>GFP</sup> intensity in different regions of the wing disc. The sample number *n* in  
47 graphs represents the number of independent tissues analyzed. In the box-plot, horizontal line  
48 represents the median of the data, lower and upper bounds of the box represent the 25<sup>th</sup> and 75<sup>th</sup>  
49 percentile of data, and the whiskers represent the minimum and maximum of the data. The  
50 scattered point on the box represents the actual data points. Scale bar in overview images, 50  
51  $\mu$ m. Scalebar in enlarged images, 15  $\mu$ m. Scalebar in (m), 10 $\mu$ m. P-values were estimated by  
52 one-way ANOVA. Comparison is shown with wing pouch and n.s represents that the  
53 differences are not significant.

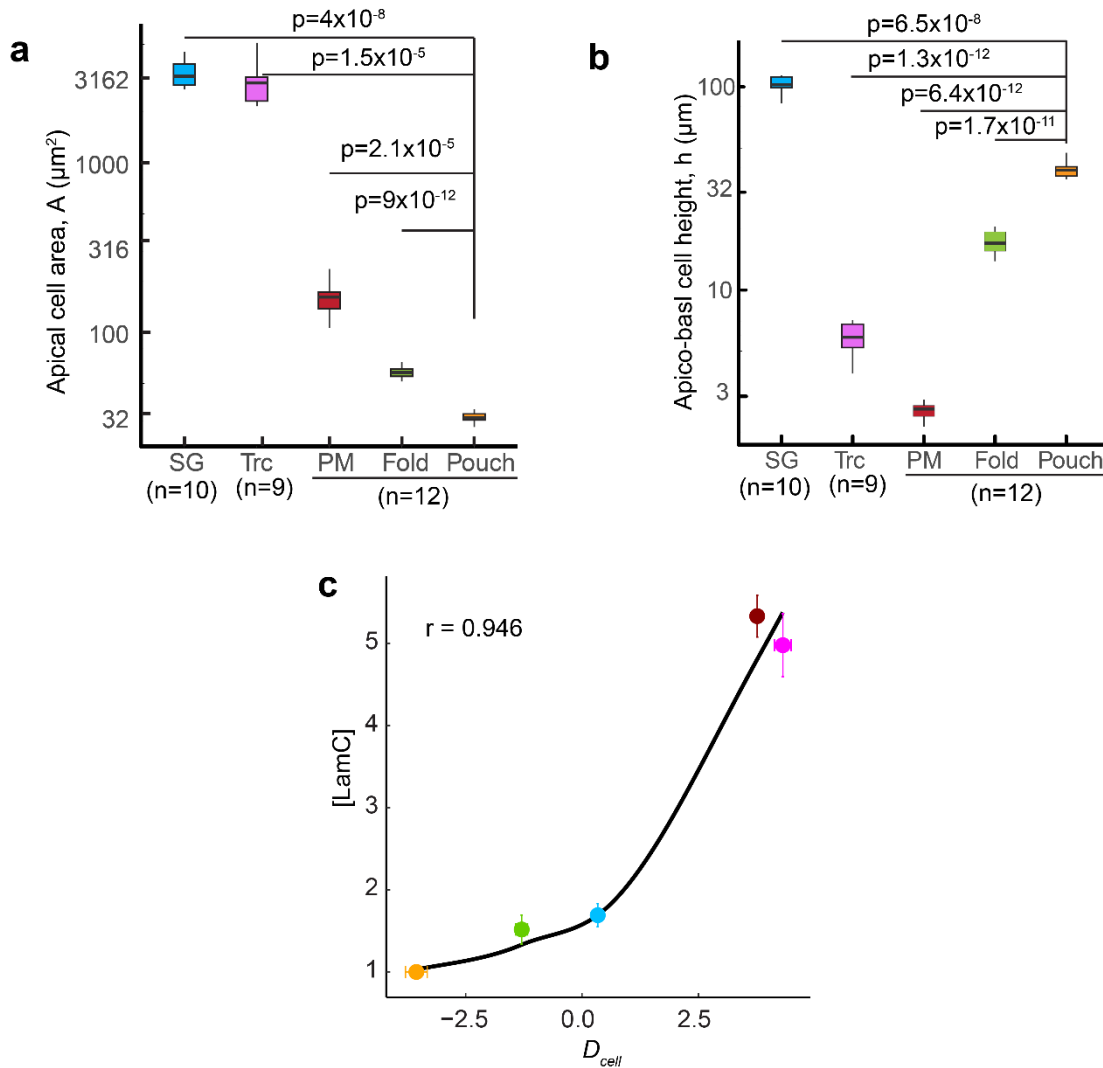

54  
55 **Supplementary Fig. 3: Cell morphology and LamC in *Drosophila* tissues.** (a) Box plot  
56 showing apical cell area in *Drosophila* tissues. Y -axis is shown in logscale. (b) Box plot  
57 showing apico-basal cell height in *Drosophila* tissues. Y-axis is shown in logscale. The sample  
58 number n represents the number of tissues analyzed. In the box-plot, horizontal line represents  
59 the median of the data, lower and upper bounds of the box represent the 25<sup>th</sup> and 75<sup>th</sup> percentile  
60 of data, and the whiskers represent the minimum and maximum of the data. The sample number  
61 n represents the number of biologically independent tissue samples. The scattered point on the  
62 box represents the actual data points. (c) Scatter plot between  $D_{cell}$  and LamC in *Drosophila*  
63 tissues. Each point represents average LamC and  $D_{cell}$  for *Drosophila* tissues. The value  $r=$   
64  $0.946$  is the Spearman's correlation coefficient between LamC and  $D_{cell}$ . Data are represented  
65 as mean values  $\pm$  S.E.M. P-values are estimated by one-way ANOVA and are represented in  
66 comparison to the values for pouch.

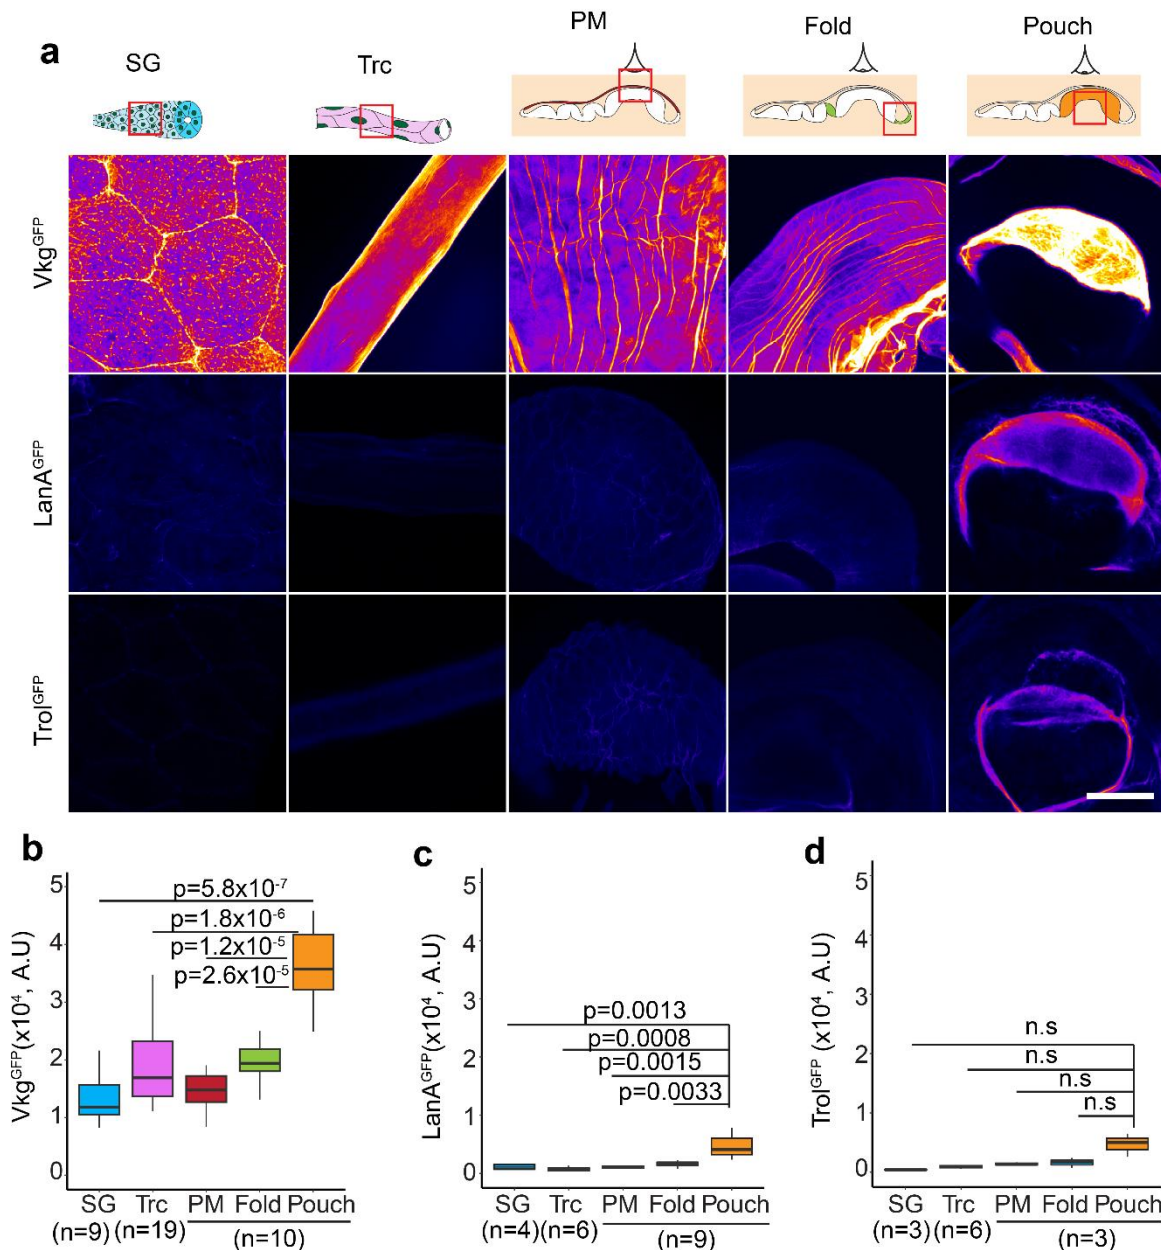

68

69 **Supplementary Fig 4: Collagen IV has a major contribution to ECM levels. (a)** Images  
 70 showing the levels of Collagen IV (top row), Laminin A (middle row) and Perlecan (bottom  
 71 row) in Salivary glands (SG), Trachea (Trc), Peripodial Membrane (PM), Fold and Pouch. **(b)**  
 72 Box plot showing the levels of Collagen IV in different epithelial tissues. **(c)** Box plot showing  
 73 the levels of Laminin A in different epithelial tissues. **(d)** Box plot showing the levels of  
 74 Perlecan (TroI<sup>GFP</sup>) in different epithelial tissues. In the box-plot, horizontal line represents the  
 75 median of the data, lower and upper bounds of the box represent the 25<sup>th</sup> and 75<sup>th</sup> percentile of  
 76 data, and the whiskers represent the minimum and maximum of the data. The scattered point  
 77 on the box represents the actual data points. The sample number *n* shown in the graphs  
 78 represents the number of independent tissue samples analyzed. P-values are estimated by one-

79 way ANOVA and are shown in comparison to the pouch and n.s represents that the differences  
 80 are not significant. Scale bar, 50  $\mu$ m.

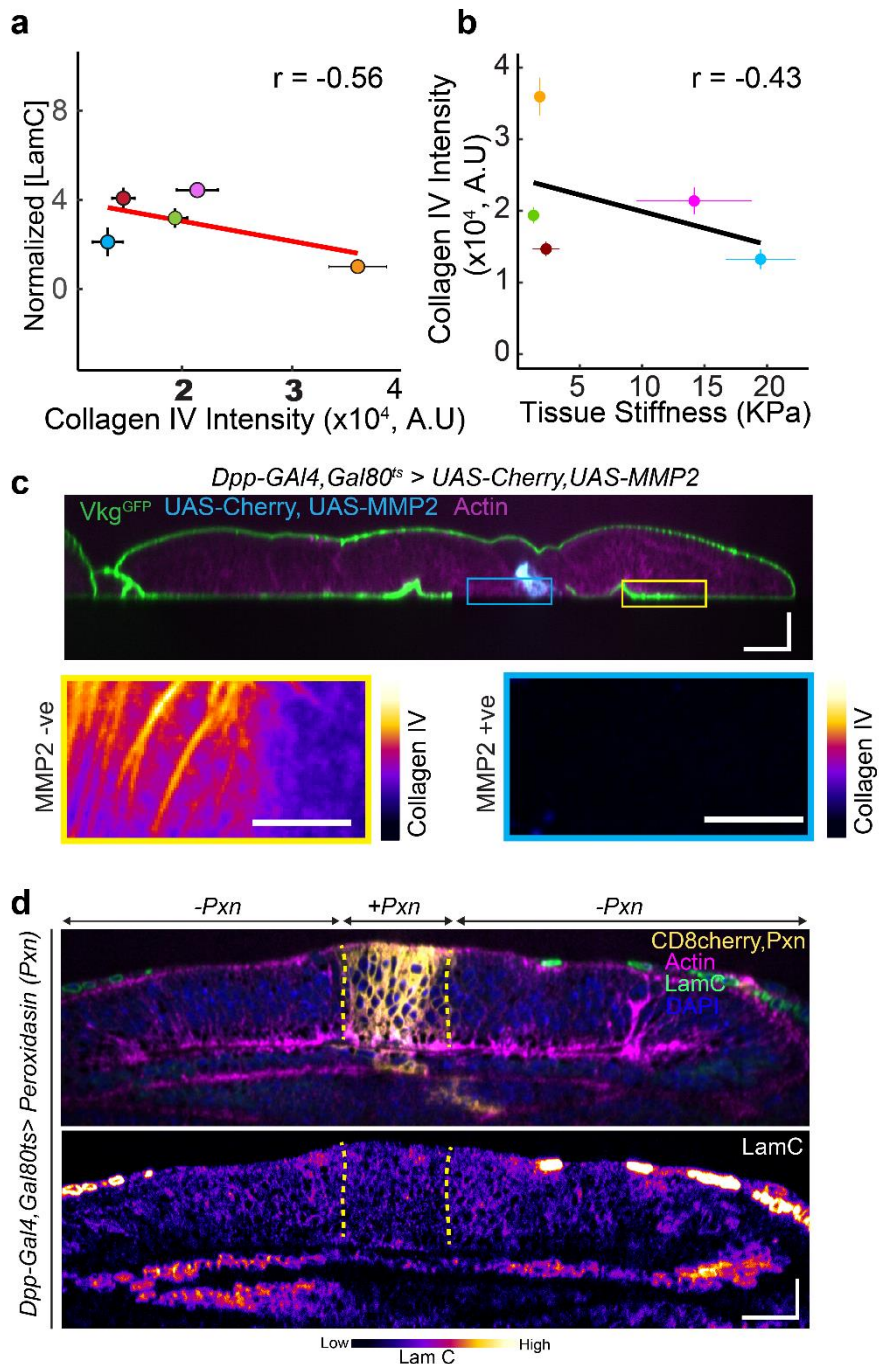

81 **Supplementary Fig. 5: LamC levels in the wing disc are not regulated by ECM levels. (a)**  
 82 Scatter plot between Collagen-IV intensity and LamC levels in epithelial tissues. Each point  
 83 represents the average value of Collagen IV and LamC levels. The value  $r$  in the scatter plot  
 84 represents the Pearson correlation coefficient between the two quantities. Data are represented  
 85 as mean values  $\pm$  S.E.M. **(b)** Scatter plot between Collagen-IV intensity and Tissue stiffness'  
 86 in epithelial tissues. Each point represents the average value of Collagen IV levels and tissue  
 87 stiffness. Data are represented as mean values  $\pm$  S.E.M. **(c)** Top panel: Cross-section view of

88 the wing disc showing  $vkg^{GFP}$  (Collagen IV) in green, actin in magenta and UAS-MMP2,UAS-  
89 CD8-Cherry in blue. MMP2 in the wing disc is driven by Dpp-GAL4,Gal80<sup>ts</sup>. Bottom panel:  
90 Enlarged XY sections Collagen IV of the regions marked by blue ROI (MMP2 +ve) and yellow  
91 ROI (MMP2 -ve). Images are color coded for Collagen IV intensity. Scale bar in overview  
92 image, 25  $\mu$ m. Scale bar in enlarged images , 15  $\mu$ m. **(d)** Top panel: Cross-section view of the  
93 wing disc showing CD8-Cherry, Pxn labelled in yellow, actin labelled in magenta, LamC  
94 labelled in green and Nucleus labelled by DAPI in blue. Bottom panel: Cross-section view of  
95 the wing disc showing LamC color coded for intensity. Scale bar, 25  $\mu$ m.

96



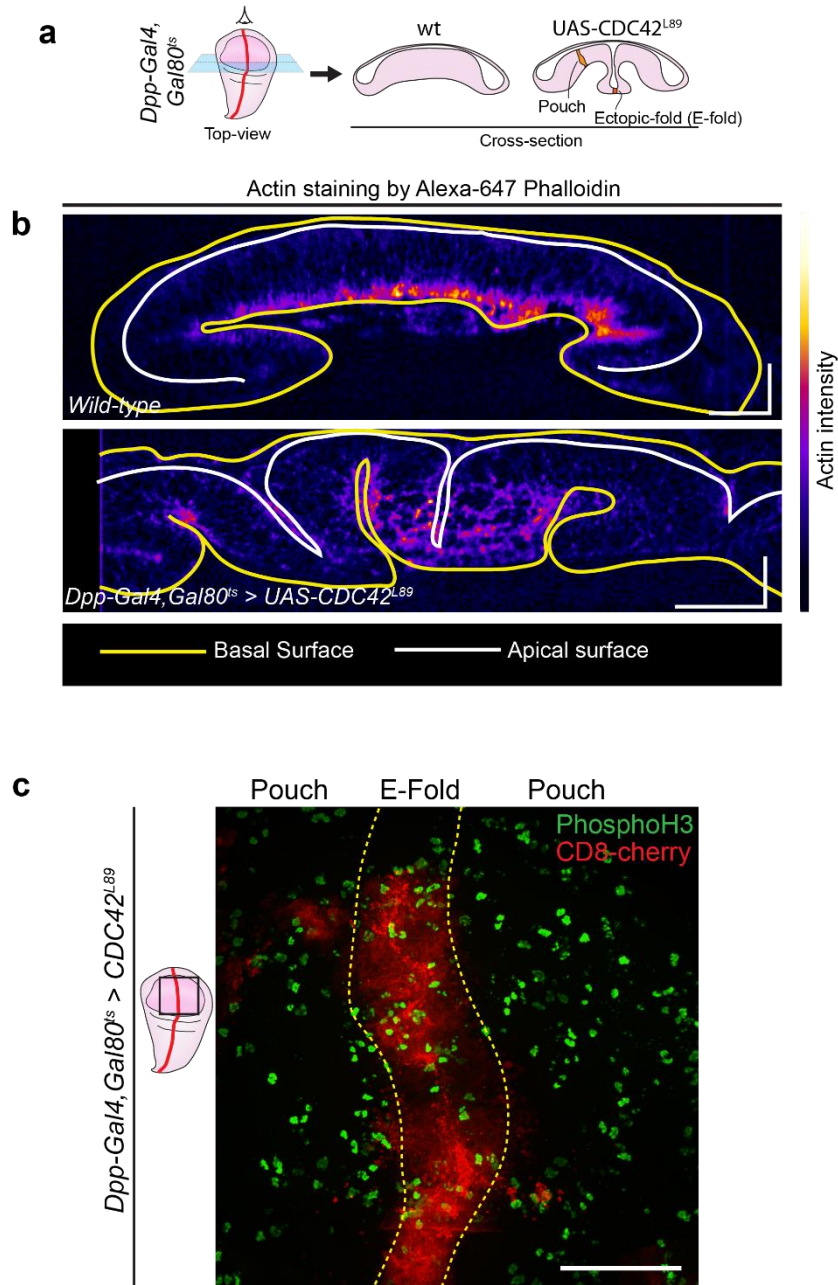

97 **Supplementary Fig. 6: Influence of dominant negative CDC42 overexpression on actin**  
 98 **organization and cell proliferation.** (a) Schematic showing top view and cross section view  
 99 of the wing disc expressing dominant negative CDC42 overexpression using Dpp-GAL4. (b)  
 100 Images showing the color-coded actin intensity in cross-section view of the wild-type wing disc  
 101 and wing disc expressing CDC42<sup>L89</sup>. Basal surface of the wing disc is shown in yellow and  
 102 apical surface of the wing disc is shown in white. Scale bar along horizontal and vertical axes,  
 103 25  $\mu$ m. (c) Image showing proliferating cells marked by phospho-Histone H3 (green) in wing  
 104 disc expressing dominant negative CDC42. The ectopic fold region is marked by yellow dotted  
 105 lines. Scale bar, 25  $\mu$ m.  
 106

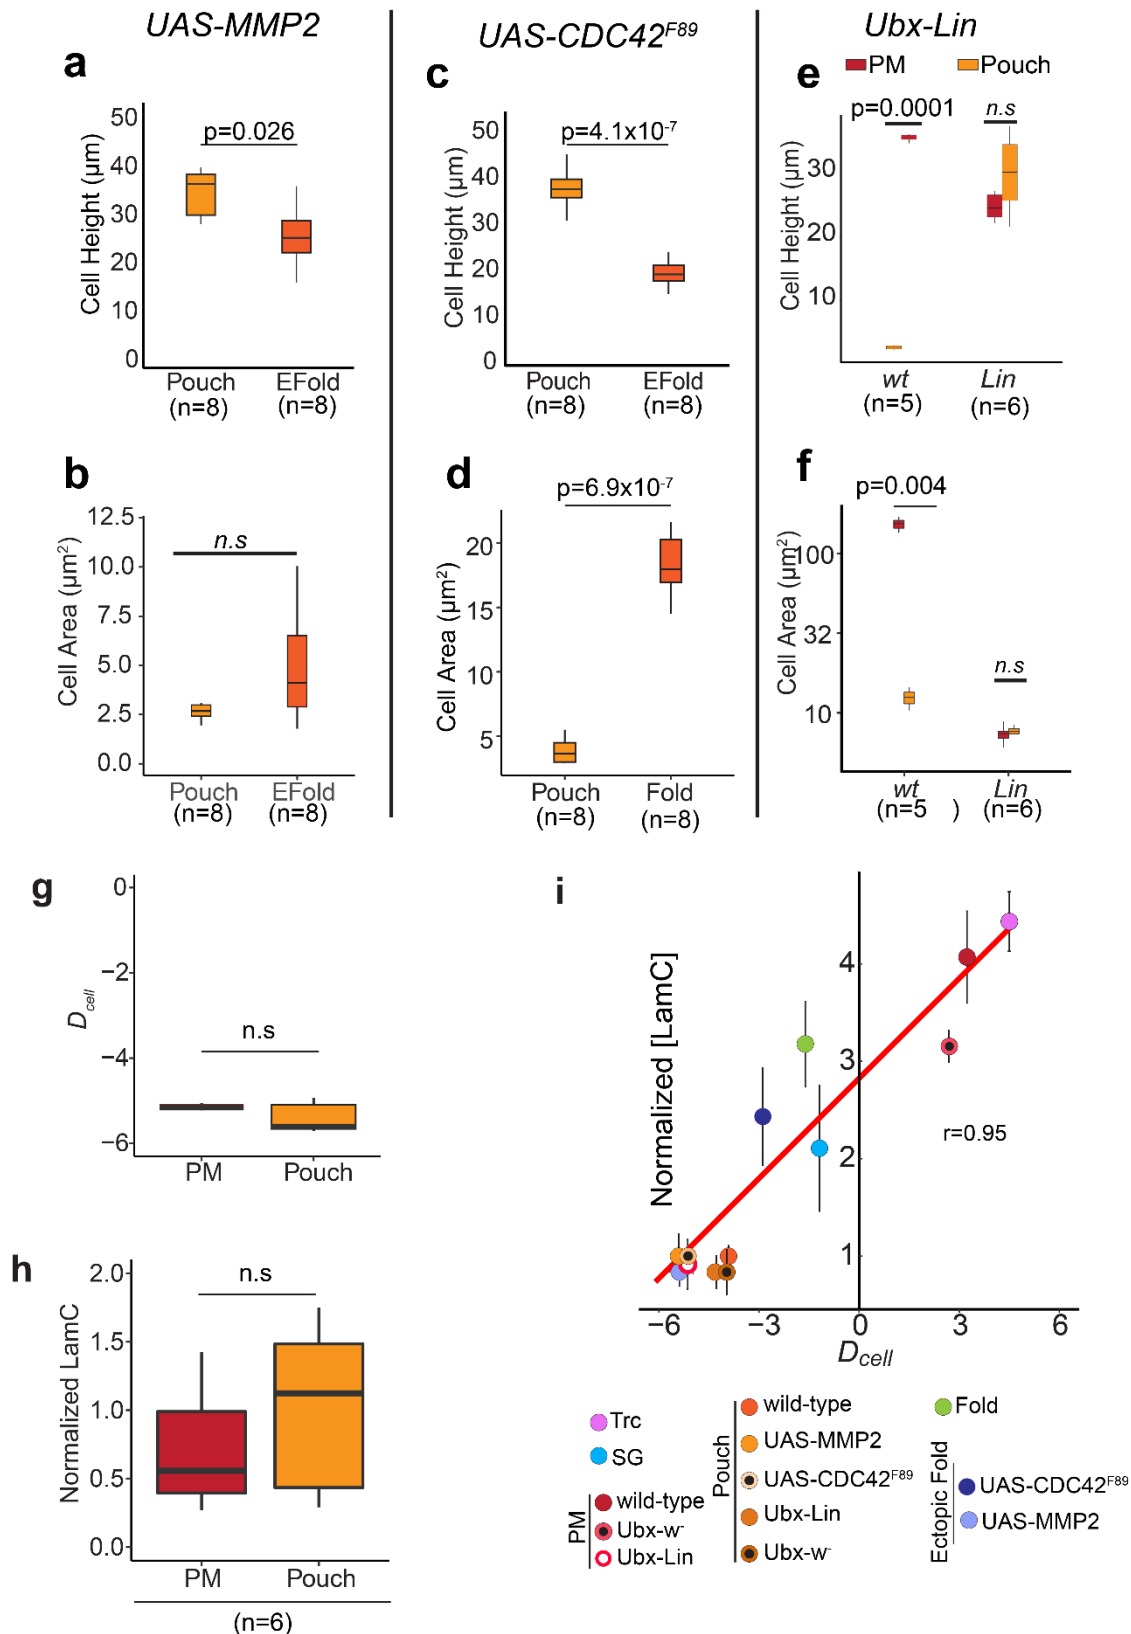

107 **Supplementary Fig. 7: Cell morphology and LamC in *Drosophila* wing disc under**  
 108 **different perturbations. (a-b)** Cell height (a) and cell area (b) in the pouch (orange) and  
 109 ectopic fold (dark orange) in wing disc expressing UAS-MMP2 by *Dpp-Gal4, Gal80<sup>ts</sup>*. (c-d)  
 110 Cell height (c) and cell area (d) in the pouch (orange) and ectopic fold (dark orange) in wing  
 111 disc expressing UAS-CDC42<sup>F89</sup> by *Dpp-Gal4, Gal80<sup>ts</sup>*. (e-f) Cell height (e) and cell area (f) in

112 PM (red) and pouch (orange) regions of the wing disc expressing either *w-* or *Lin* by Ubx-Gal4.  
113 The sample number  $n$  in the graphs represents the number of tissues analyzed. **(g)** Box plot  
114 showing  $D_{cell}$  values for PM and pouch in wing discs expression *UAS-Lin*. **(h)** Box plot showing  
115 normalized LamC levels for PM and pouch in wing discs expressing *UAS-Lin*. In the box-plot,  
116 horizontal line represents the median of the data, lower and upper bounds of the box represent  
117 the 25<sup>th</sup> and 75<sup>th</sup> percentile of data, and the whiskers represent the minimum and maximum of  
118 the data. The scattered point on the box represents the actual data points. The sample number  
119  $n$  in the graphs represents the number of biologically independent tissues analyzed. **(i)** Scatter  
120 plot between Normalized LamC levels and  $D_{cell}$ . The data includes different perturbations  
121 which change  $D_{cell}$  in the wing disc. Normalization is done with respect to the *wt* control in the  
122 respective experiment. The Pearson Correlation coefficient is 0.95 with FDR of  $2 \times 10^{-5}$ . Data  
123 are represented as mean values  $\pm$  S.E.M. P-values are estimated using two-sided Student's t-  
124 test and n.s represents that the differences are not statistically significant.

125

126

127

128

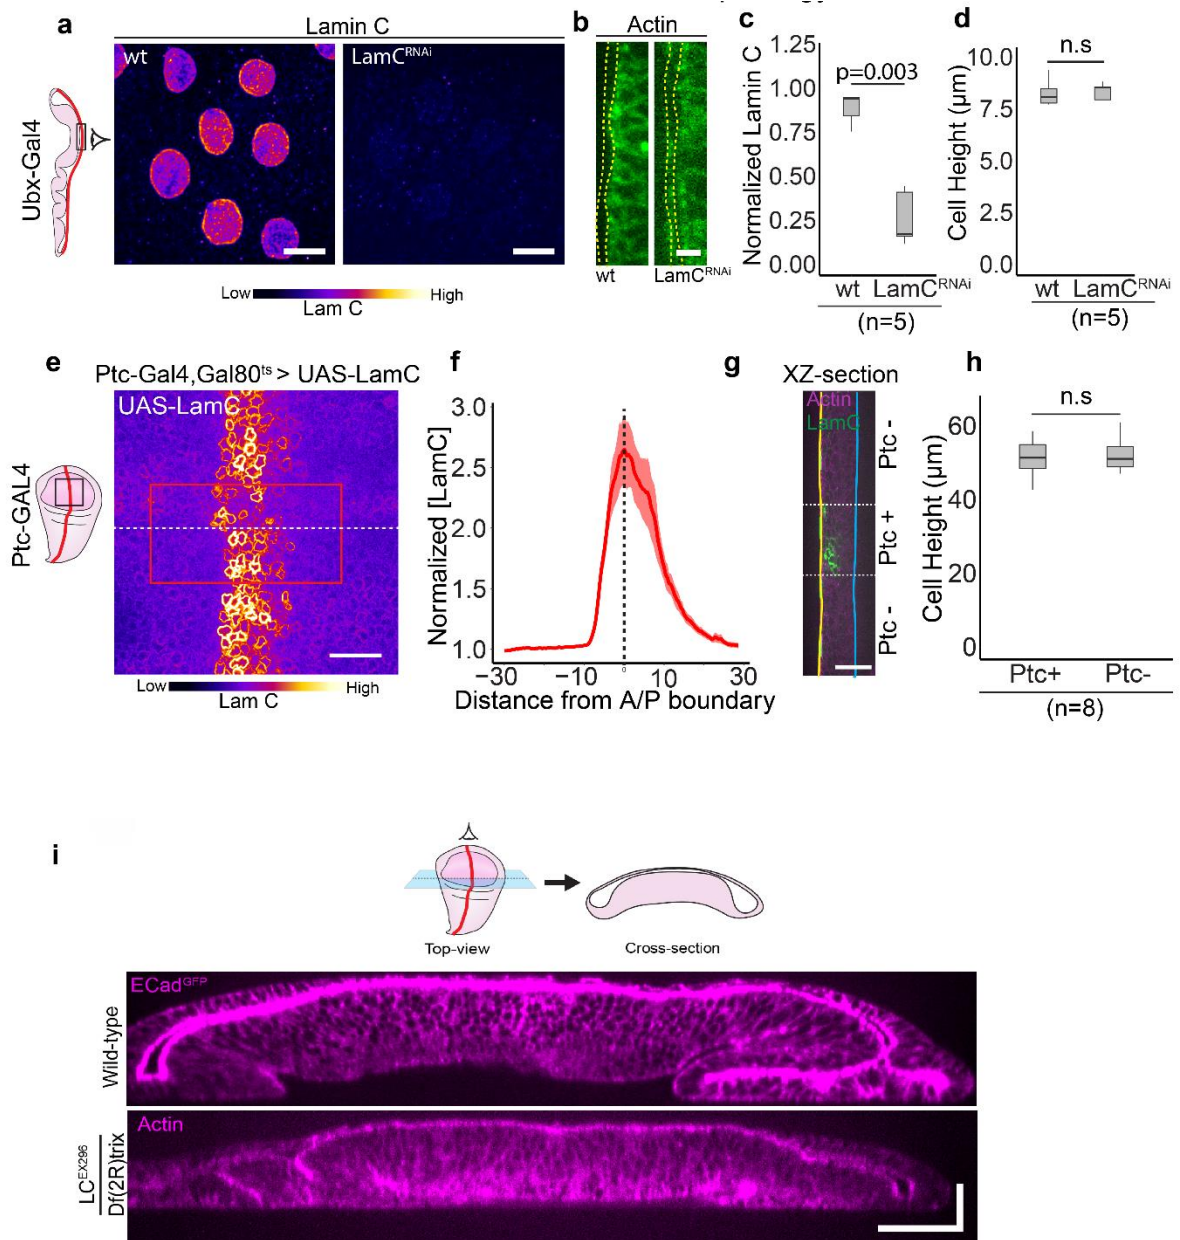

129

130

131 **Supplementary Fig. 8: Morphology of wing disc cells is independent of Lamin C levels.**

132 (a) Images showing LamC in the PM region of the wing discs, in which Ubx-Gal4 either drives

133 w- (left) or UAS-LamC<sup>RNAi</sup>(right). Scale bar, 10  $\mu m$  (b) Cross-section views of the PM region

134 of the wing disc shown actin (in green) for discs driving w- (left) or UAS-LamC<sup>RNAi</sup> (right).

135 Yellow dotted lines show the width of the PM layer of the wing disc. Scale bar, 10  $\mu m$  (c) Box

136 plot showing normalized LamC in the PM region of the wing disc. Normalization is performed

137 w.r.t wt. (d) Box plot showing cell height in w- and  $LamC^{RNAi}$  expressing cells. (e) Image shows

138 LamC in the pouch region of the wing disc, where LamC is overexpressed by Ptc-GAL4 stripe

139 in temperature controlled manner using Gal80<sup>ts</sup>. The image is color coded for LamC intensity.

140 Scale bar, 15  $\mu m$ .(f) Normalized LamC intensity profile for the region marked by red ROI in

141 (e). Data are represented as mean values  $\pm$  S.E.M. The mean over the region is plotted by the  
142 solid red line and the shaded region in red shows the S.E.M. Vertical dotted line marks the A/P  
143 boundary. (g) XZ section of the wing disc along the dotted line shown in (e). Actin is shown in  
144 magenta and LamC is shown in green. The yellow and blue solid lines mark the apical and basal  
145 surface of the wing pouch respectively. The two dotted lines marks the region of Ptc expression,  
146 where LamC is overexpressed. Scale bar, 50  $\mu$ m (h) Box plot showing cell height in Ptc+ and  
147 Ptc- cells. In the box-plot, horizontal line represents the median of the data, lower and upper  
148 bounds of the box represent the 25<sup>th</sup> and 75<sup>th</sup> percentile of data, and the whiskers represent the  
149 minimum and maximum of the data. The scattered point on the box represents the actual data  
150 points. (i) Cross-section view of wild-type wing disc, and wing disc mutant for LamC  
151 (LamC<sup>EX296</sup>/Df(2R)trix. Top panel: wild-type disc with ECadGFP labelled in magenta. Bottom  
152 panel: Mutant disc with Actin labelled in magenta. Scale bar along both axes, 25  $\mu$ m. P-values  
153 are estimated using two-sided Student's t-test and n.s represents that differences are not  
154 statistically significant.  
155

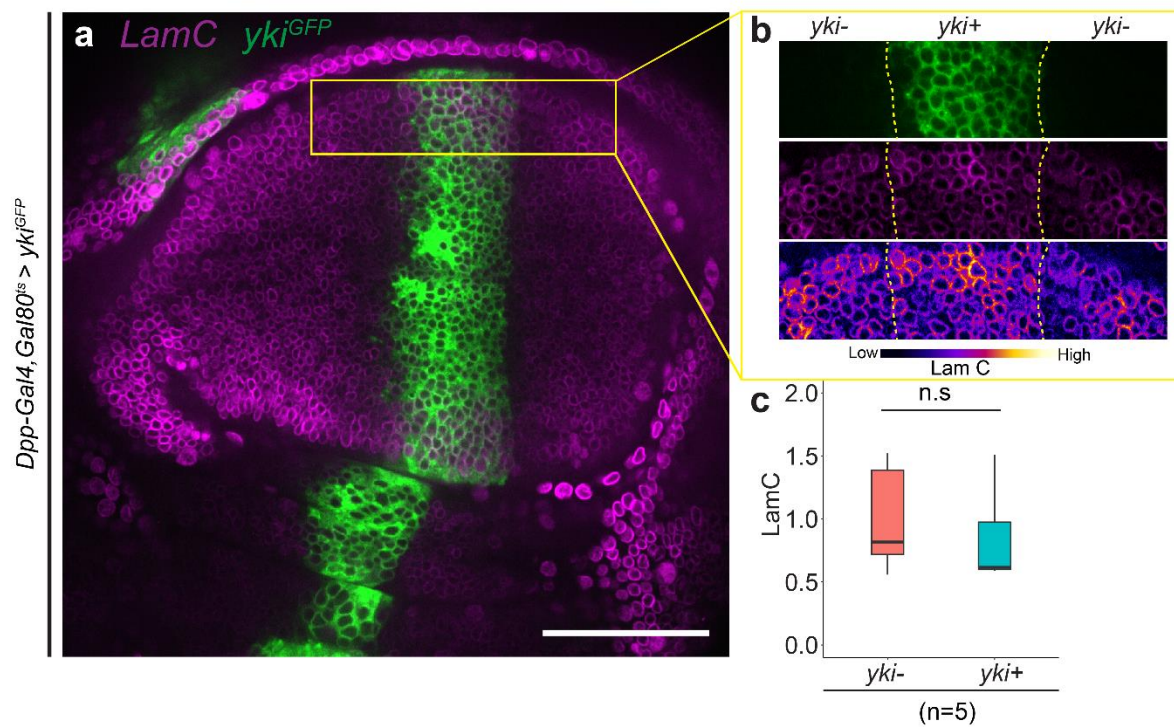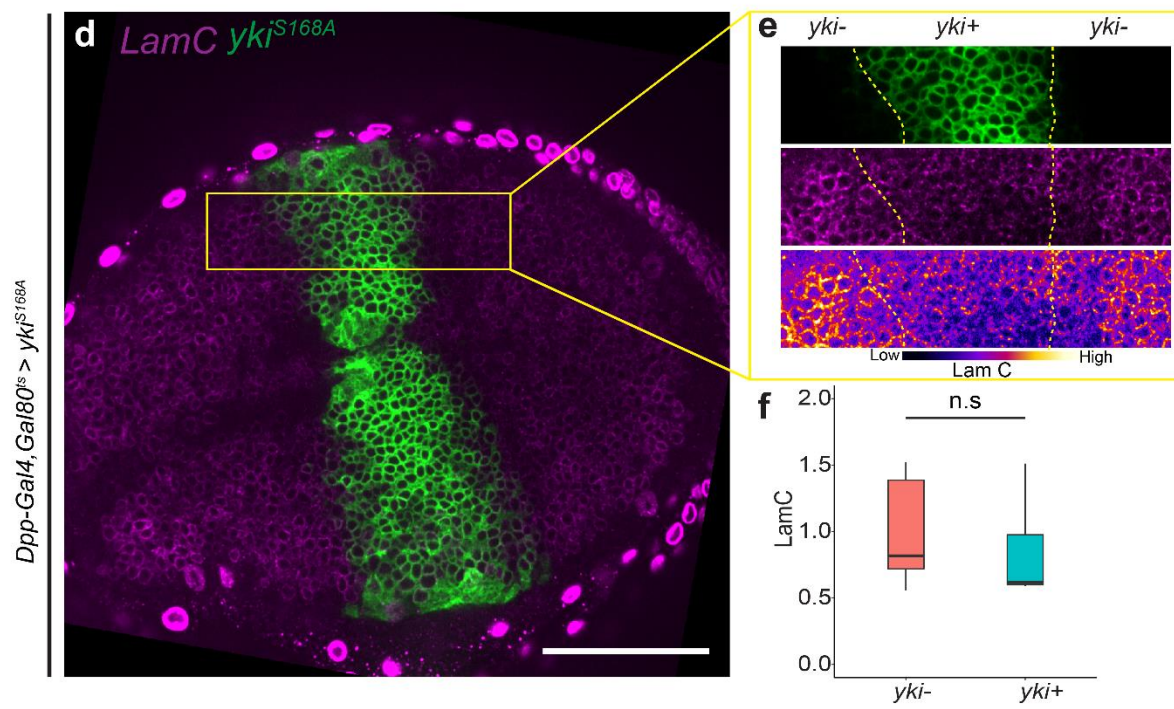

156

157 **Supplementary Figure 9: Overexpression of Yki does not influence LamC levels in the**  
 158 **wing disc. (a)** Image showing wing disc expressing UAS-ykiGFP (green) in a stripe of cell  
 159 driven by Dpp-Gal4. LamC is shown in magenta. **(b)** Enlarged region of the yellow ROI shown  
 160 in (a). The region of cells expressing yki are marked by a yellow dotted lines. Top panel: Yki,  
 161 middle panel, LamC, bottom panel: color coded LamC. **(c)** Box-plot showing the levels of  
 162 LamC in yki expressing (*yki+*) and yki not expressing (*yki-*) cells. **(d)** Image showing wing

163 disc expressing UAS-ykiS168A (marked by CD8-Cherry expressing cells in green) in a stripe  
164 of cells driven by Dpp-Gal4. LamC is shown in magenta. **(e)** Enlarged region of the yellow ROI  
165 shown in (d). The region of cells expressing yki are marked by a yellow dotted lines. Top panel:  
166 Yki, middle panel, LamC, bottom panel: color coded LamC. **(f)** Box-plot showing the levels of  
167 LamC in yki expressing (yki+) and yki not expressing (yki-) cells. In the box-plot, horizontal  
168 line represents the median of the data, lower and upper bounds of the box represent the 25<sup>th</sup> and  
169 75<sup>th</sup> percentile of data, and the whiskers represent the minimum and maximum of the data. The  
170 scattered point on the box represents the actual data points. P-values are estimated using two-  
171 sided Student's t-test and n.s represents that the differences are not significant. Scale bar, 25  
172  $\mu\text{m}$ .  
173

Supplementary Fig 10: Nuclear cross-sectional area and height in Salivary glands and trachea

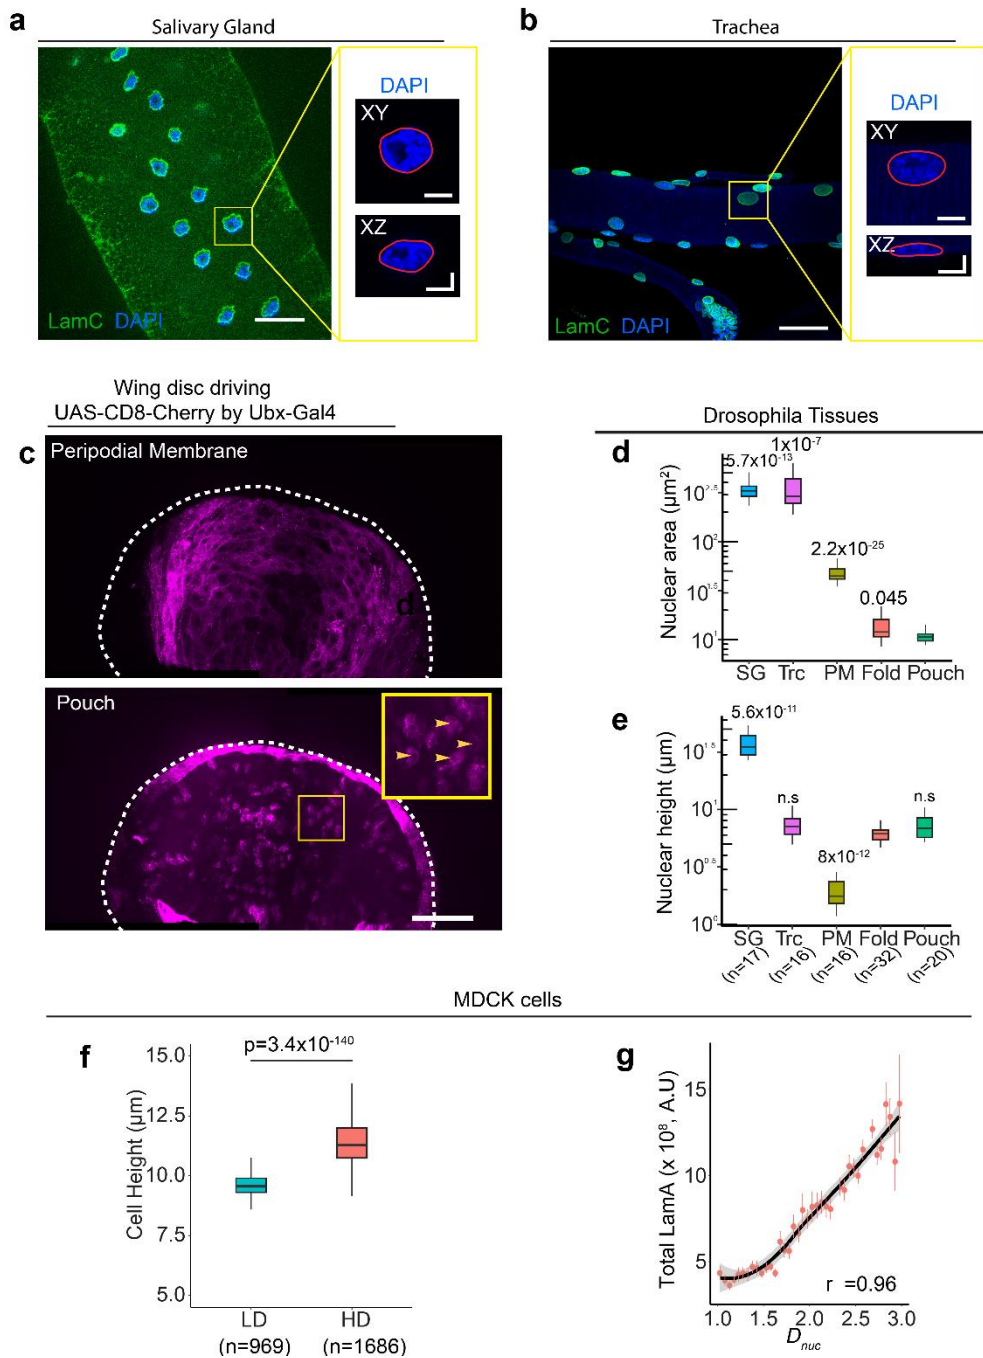

175

176

177

178

179

180

181

182

**Supplementary Fig. 10: Nuclear morphology in Epithelial tissues.** (a) Image showing LamC (green) and DAPI (blue) in Salivary gland. Scale bar, 50  $\mu\text{m}$ . Right panel shows the enlarged XY and XZ images of the nucleus marked by Yellow ROI. Nucleus is labelled by DAPI in blue and the nuclear outline is marked by solid red line. Scale bar, 10  $\mu\text{m}$  along both axes. (b) Image showing LamC (green) and DAPI (blue) in Trachea. Scale bar, 50  $\mu\text{m}$ . Right panel shows the enlarged XY and XZ images of the nucleus marked by Yellow ROI. Nucleus is labelled by DAPI in blue and the nuclear outline is marked by solid red line. Scale bar, 10  $\mu\text{m}$  along both



183 axes. **(c)** Wing disc driving UAS-CD8-Cherry by Ubx-Gal4. Left panel shows the PM region  
184 and right panel shows the pouch region. Inset image in the right panel is the enlarged image of  
185 the region marked by yellow ROI. Arrowheads show individual cells labelled by UAS-CD8-  
186 Cherry. Scale bar, 50  $\mu\text{m}$ . **(d)** Box plot showing ox nuclear cross-sectional area in different  
187 *Drosophila* tissues. Y axis is shown in logscale. **(e)** Box plot showing nuclear height in different  
188 *Drosophila* tissues. Y axis is shown in logscale. **(f)** Box plot showing cell height in low density  
189 (cyan) and high density (red) cultures. The sample number  $n$  represents the number of cells  
190 analysed over 3 biologically independent experiments. In the box-plot, horizontal line  
191 represents the median of the data, lower and upper bounds of the box represent the 25<sup>th</sup> and 75<sup>th</sup>  
192 percentile of data, and the whiskers represent the minimum and maximum of the data. The  
193 scattered point on the box represents the actual data points. **(g)** Binned scatter plot between  $D_{nuc}$   
194 and total Lamin A in MDCK cells. Solid black line shows the LOESS regression fit to the data.  
195 Data are represented as mean values  $\pm$  S.E.M. P-values were estimated using one-way ANOVA  
196 and comparison is shown w.r.t the wing pouch and n.s represents that the differences are not  
197 statistically significant.

198

199

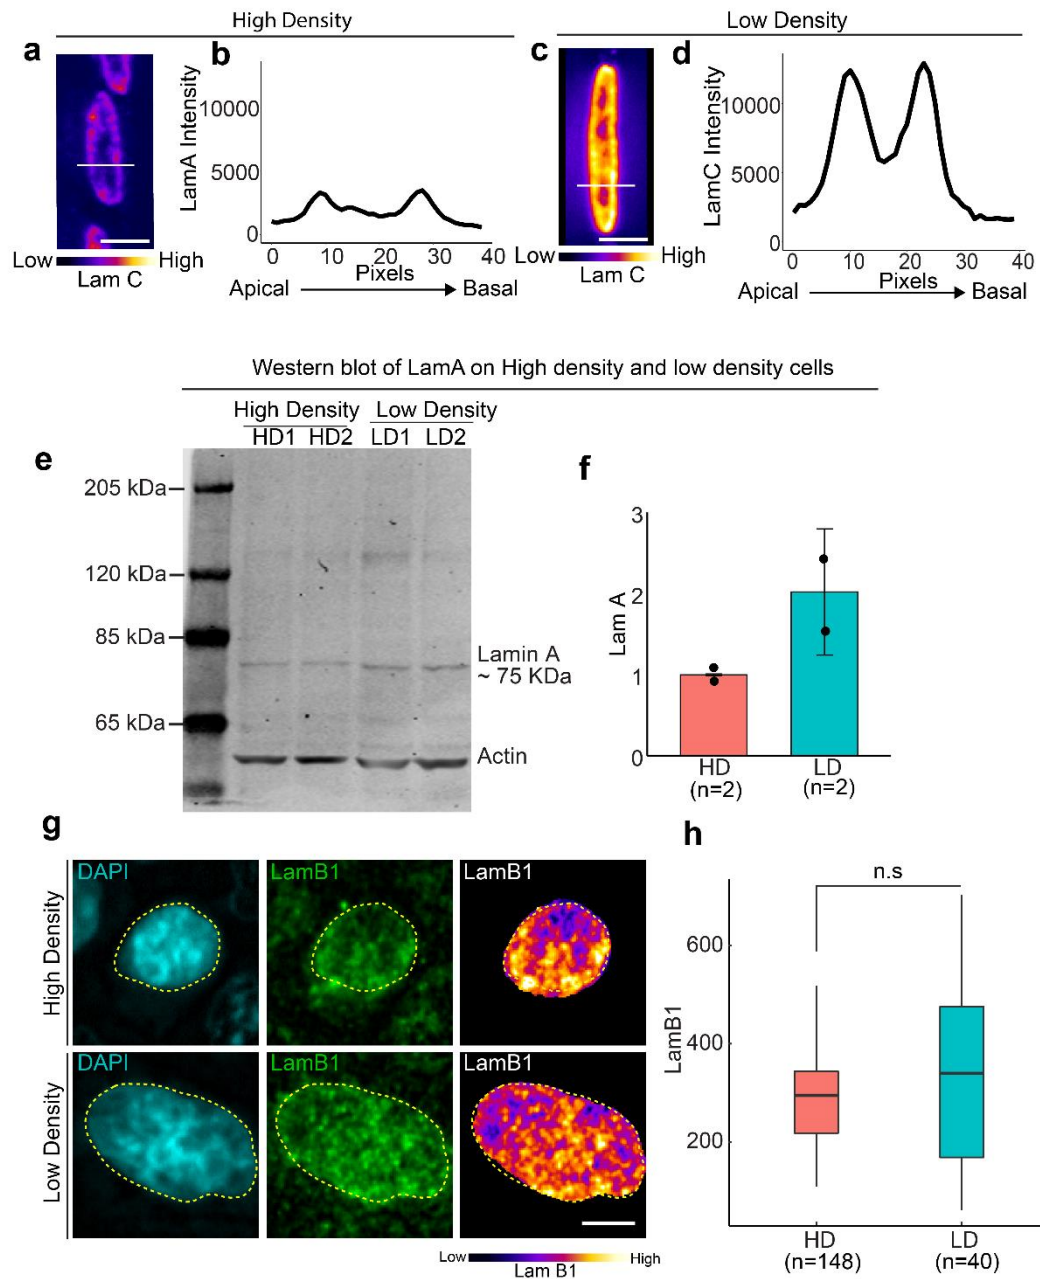

200 **Supplementary Figure 11: LamA and LamB1 staining in MDCK cells.** (a) Cross-section  
 201 view of the nucleus of an HD cell. The image is color-coded for LamA. (b) Line profile of  
 202 LamA in the nucleus along the white line shown in (a). (c) Cross-section view of the nucleus  
 203 of an HD cell. The image is color-coded for LamA. (d) Line profile of LamA in the nucleus  
 204 along the white line shown in (c). Scale bar, 10  $\mu$ m. (e) Image showing the Immunoblot of HD  
 205 and LD cells in replicates. (f) Quantification of the levels of LamA from the immunoblot  
 206 images. The intensity is normalized to the actin loading control. Data are represented as mean  
 207 values  $\pm$  S.E.M. Black points represents the actual data points. (g) Images showing DAPI (cyan)  
 208 and LamB1 (green and color coded) in HD and LD cultures. Scale bar, 5  $\mu$ m. (h) Box plot  
 209 showing the levels of LamB1 in the nucleus. In the box-plot, horizontal line represents the

210 median of the data, lower and upper bounds of the box represent the 25<sup>th</sup> and 75<sup>th</sup> percentile of  
211 data, and the whiskers represent the minimum and maximum of the data. The scattered point  
212 on the box represents the actual data points. The sample number  $n$  represents the number of  
213 biologically independent experiments. P-values are computed using two-sided Student's t-test  
214 and n.s represents that the differences are not significant.

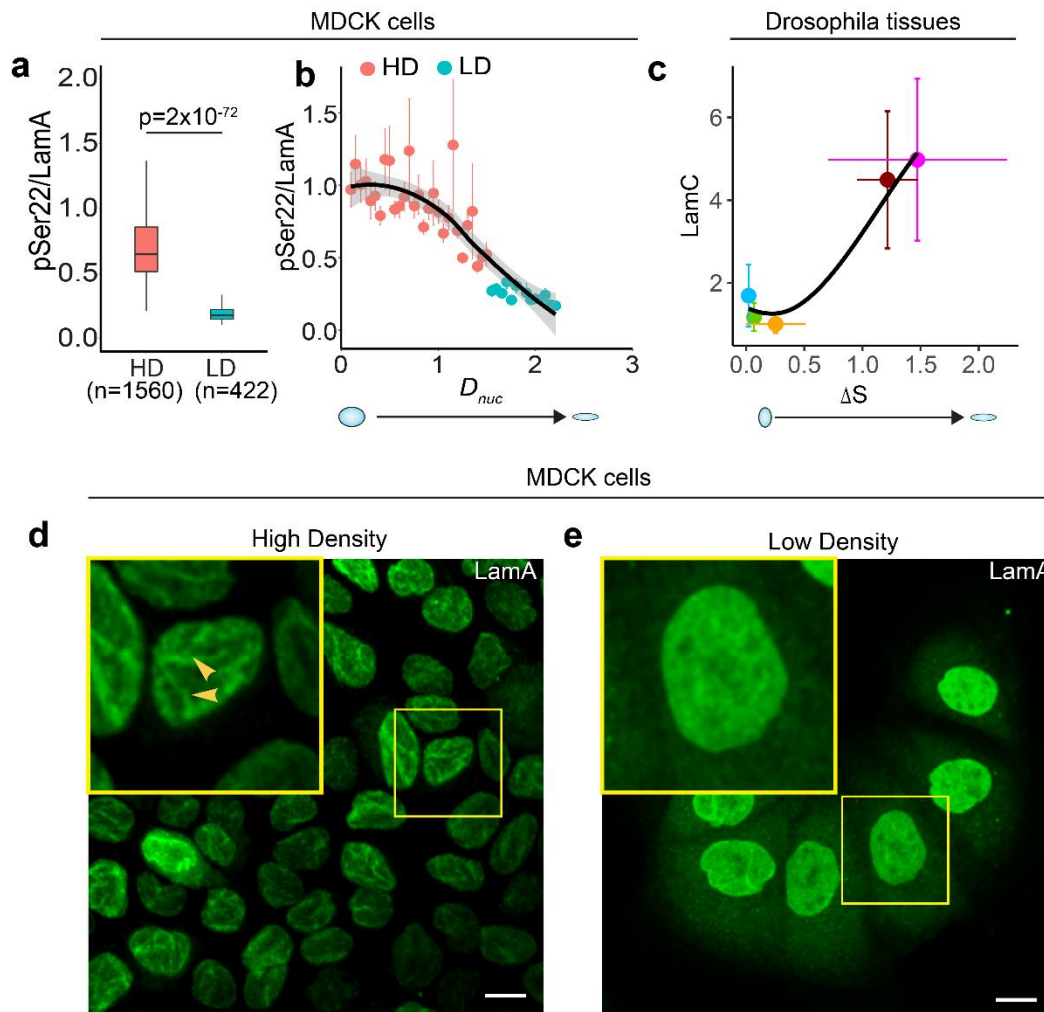

215 **Supplementary Figure 12: Nuclear flattening stretches lamina and alters levels of**  
 216 **phosphorylated Lamin A/C.** (a) Box plot showing the ratio of pSer22 to LamA in HD and LD  
 217 cells. In the box-plot, horizontal line represents the median of the data, lower and upper bounds  
 218 of the box represent the 25<sup>th</sup> and 75<sup>th</sup> percentile of data, and the whiskers represent the minimum  
 219 and maximum of the data. The sample number  $n$  represents the number of cells analysed over  
 220 2 biologically independent experiments. The scattered point on the box represents the actual  
 221 data points. (b) Scatter plot showing the ratio of pSer22 to LamA as a function of  $D_{nuc}$  for HD  
 222 cells (red points) and LD cells (blue points). Solid black line represents the LOESS regression  
 223 smoothing of the data. Data are represented as mean values  $\pm$  S.E.M. (c) Scatter plot shown  
 224 LamC levels as a function of the surface area strain in *Drosophila* epithelial tissues – SG (light  
 225 blue), Trc (magenta), PM (dark red), Fold (light green) and Pouch (orange). Data are  
 226 represented as mean values  $\pm$  S.E.M. (d) Image showing LamA in high density MDCK cell  
 227 culture. Inset is the enlarged view of the region marked by yellow ROI. Yellow arrowheads  
 228 shows undulations in the lamina. (e) Image showing LamA in low density MDCK cell culture.

229 Inset is the enlarged view of the region marked by yellow ROI. Data are represented as mean  
230 value  $\pm$  S.E.M. Scale bar, 10  $\mu$ m. P-values are estimated using two-sided Student's t-test.
