# Supplementary material for: Apico-basal cell compression regulates Lamin A/C levels in epithelial tissues
Source: PubMed Central journal article supplement (PMC7994818; doi:10.1038/s41467-021-22010-9), 2021-03-25
Supplement: 41467_2021_22010_MOESM3_ESM.pdf [file 41467_2021_22010_MOESM3_ESM.pdf]

## Reporting Summary

Nature Research wishes to improve the reproducibility of the work that we publish. This form provides structure for consistency and transparency in reporting. For further information on Nature Research policies, see our [Editorial Policies](#) and the [Editorial Policy Checklist](#).

### Statistics

For all statistical analyses, confirm that the following items are present in the figure legend, table legend, main text, or Methods section.

- | n/a                                 | Confirmed                                                                                                                                                                                                                                                                                      |
|-------------------------------------|------------------------------------------------------------------------------------------------------------------------------------------------------------------------------------------------------------------------------------------------------------------------------------------------|
| <input type="checkbox"/>            | <input checked="" type="checkbox"/> The exact sample size ( $n$ ) for each experimental group/condition, given as a discrete number and unit of measurement                                                                                                                                    |
| <input type="checkbox"/>            | <input checked="" type="checkbox"/> A statement on whether measurements were taken from distinct samples or whether the same sample was measured repeatedly                                                                                                                                    |
| <input type="checkbox"/>            | <input checked="" type="checkbox"/> The statistical test(s) used AND whether they are one- or two-sided<br><i>Only common tests should be described solely by name; describe more complex techniques in the Methods section.</i>                                                               |
| <input checked="" type="checkbox"/> | <input type="checkbox"/> A description of all covariates tested                                                                                                                                                                                                                                |
| <input type="checkbox"/>            | <input checked="" type="checkbox"/> A description of any assumptions or corrections, such as tests of normality and adjustment for multiple comparisons                                                                                                                                        |
| <input type="checkbox"/>            | <input checked="" type="checkbox"/> A full description of the statistical parameters including central tendency (e.g. means) or other basic estimates (e.g. regression coefficient) AND variation (e.g. standard deviation) or associated estimates of uncertainty (e.g. confidence intervals) |
| <input type="checkbox"/>            | <input checked="" type="checkbox"/> For null hypothesis testing, the test statistic (e.g. $F$ , $t$ , $r$ ) with confidence intervals, effect sizes, degrees of freedom and $P$ value noted<br><i>Give <math>P</math> values as exact values whenever suitable.</i>                            |
| <input checked="" type="checkbox"/> | <input type="checkbox"/> For Bayesian analysis, information on the choice of priors and Markov chain Monte Carlo settings                                                                                                                                                                      |
| <input checked="" type="checkbox"/> | <input type="checkbox"/> For hierarchical and complex designs, identification of the appropriate level for tests and full reporting of outcomes                                                                                                                                                |
| <input type="checkbox"/>            | <input checked="" type="checkbox"/> Estimates of effect sizes (e.g. Cohen's $d$ , Pearson's $r$ ), indicating how they were calculated                                                                                                                                                         |

*Our web collection on [statistics for biologists](#) contains articles on many of the points above.*

### Software and code

Policy information about [availability of computer code](#)

Data collection

Data analysis

For manuscripts utilizing custom algorithms or software that are central to the research but not yet described in published literature, software must be made available to editors and reviewers. We strongly encourage code deposition in a community repository (e.g. GitHub). See the Nature Research [guidelines for submitting code & software](#) for further information.

### Data

Policy information about [availability of data](#)

All manuscripts must include a [data availability statement](#). This statement should provide the following information, where applicable:

- Accession codes, unique identifiers, or web links for publicly available datasets
- A list of figures that have associated raw data
- A description of any restrictions on data availability

## Field-specific reporting

Please select the one below that is the best fit for your research. If you are not sure, read the appropriate sections before making your selection.

Life sciences       Behavioural & social sciences       Ecological, evolutionary & environmental sciences

For a reference copy of the document with all sections, see [nature.com/documents/nr-reporting-summary-flat.pdf](https://www.nature.com/documents/nr-reporting-summary-flat.pdf)

## Life sciences study design

All studies must disclose on these points even when the disclosure is negative.

|                 |                                                                                                                                                                                  |
|-----------------|----------------------------------------------------------------------------------------------------------------------------------------------------------------------------------|
| Sample size     | Sample sizes were chosen such that the mean and standard deviation can be reliably estimated. Thus most of the experiments included 5 or more independent biological replicates. |
| Data exclusions | No data were excluded                                                                                                                                                            |
| Replication     | Replication of the experiments were successful. Experiments were performed independantly atleast 3 times to test replicability                                                   |
| Randomization   | This is not relevant for this study as samples were not grouped                                                                                                                  |
| Blinding        | Blinding is not relevant for this study as the samples were not grouped                                                                                                          |

## Reporting for specific materials, systems and methods

We require information from authors about some types of materials, experimental systems and methods used in many studies. Here, indicate whether each material, system or method listed is relevant to your study. If you are not sure if a list item applies to your research, read the appropriate section before selecting a response.

### Materials & experimental systems

### Methods

| n/a                                 | Involved in the study                                           | n/a                                 | Involved in the study                           |
|-------------------------------------|-----------------------------------------------------------------|-------------------------------------|-------------------------------------------------|
| <input type="checkbox"/>            | <input checked="" type="checkbox"/> Antibodies                  | <input checked="" type="checkbox"/> | <input type="checkbox"/> ChIP-seq               |
| <input type="checkbox"/>            | <input checked="" type="checkbox"/> Eukaryotic cell lines       | <input checked="" type="checkbox"/> | <input type="checkbox"/> Flow cytometry         |
| <input checked="" type="checkbox"/> | <input type="checkbox"/> Palaeontology and archaeology          | <input checked="" type="checkbox"/> | <input type="checkbox"/> MRI-based neuroimaging |
| <input type="checkbox"/>            | <input checked="" type="checkbox"/> Animals and other organisms |                                     |                                                 |
| <input checked="" type="checkbox"/> | <input type="checkbox"/> Human research participants            |                                     |                                                 |
| <input checked="" type="checkbox"/> | <input type="checkbox"/> Clinical data                          |                                     |                                                 |
| <input checked="" type="checkbox"/> | <input type="checkbox"/> Dual use research of concern           |                                     |                                                 |

## Antibodies

|                 |                                                                                                                                                                                                                                                                                                                                                                                                                                                                                                                                                                                                                                                                                                                                                                                                                                                 |
|-----------------|-------------------------------------------------------------------------------------------------------------------------------------------------------------------------------------------------------------------------------------------------------------------------------------------------------------------------------------------------------------------------------------------------------------------------------------------------------------------------------------------------------------------------------------------------------------------------------------------------------------------------------------------------------------------------------------------------------------------------------------------------------------------------------------------------------------------------------------------------|
| Antibodies used | Lamin C: obtained from Developmental Studies Hybridoma Bank (DSHB), Cat No. LC28.26<br>Lamin DMO: Obtained from DSHB, Cat No. ADL67.10<br>Lamin A: Obtained from Thermo Fischer, Cat No. MA1-06101, Clone Name: 133A2<br>ZO1: Obtained from Thermo Fischer, Cat No. 40-2200<br>phospho Ser22 LamA: Obtained from Cell Signaling Technologies, cat No. 20265<br>Lam B1: Obtained from Abcam, Cat No. ab8982<br>Actin: Obtained from Abcan, Cat No. 8227<br>Polyclonal phospho-Histone H3: obtained from Sigma Aldrich, Cat No. 06-570<br>Goat anti-mouse Alexa 647: Obtained from Thermo Fischer, Cat No. A28181<br>Goat anti-mouse Alexa 488: Obtained from Thermo Fischer, Cat No. A-21121<br>Donkey anti-Rabbit IgG IRdye 680 : Obtained from LiCor, Cat No. 926-68073<br>Donkey anti-Mouse IRdye 800: Obtained from LiCor, Cat No. 926-32212 |
| Validation      | Lamin A: The antibody was verified by relative expression to ensure that the antibody binds to the antigen stated.<br>ZO-1: This Antibody was verified by Knockdown to ensure that the antibody binds to the antigen stated.                                                                                                                                                                                                                                                                                                                                                                                                                                                                                                                                                                                                                    |

## Eukaryotic cell lines

Policy information about [cell lines](#)

|                     |                                                                                |
|---------------------|--------------------------------------------------------------------------------|
| Cell line source(s) | Madin Darby Canine Kidney cells (MDCK II), Public Health England, cat#00062107 |
| Authentication      | The cell line was not authenticated                                            |

|                                                                      |                                                 |
|----------------------------------------------------------------------|-------------------------------------------------|
| Mycoplasma contamination                                             | The cell line is tested negative for mycoplasma |
| Commonly misidentified lines<br>(See <a href="#">ICLAC</a> register) | No                                              |

## Animals and other organisms

Policy information about [studies involving animals](#); [ARRIVE guidelines](#) recommended for reporting animal research

|                         |                                                                                                                                                                                                                                                                                                                                                                                                                                                                                                                                                                                                                                                                                                                                                                                                                                                                                                                                                                                                                                                                                                                                                                                                                                                                                                                                   |
|-------------------------|-----------------------------------------------------------------------------------------------------------------------------------------------------------------------------------------------------------------------------------------------------------------------------------------------------------------------------------------------------------------------------------------------------------------------------------------------------------------------------------------------------------------------------------------------------------------------------------------------------------------------------------------------------------------------------------------------------------------------------------------------------------------------------------------------------------------------------------------------------------------------------------------------------------------------------------------------------------------------------------------------------------------------------------------------------------------------------------------------------------------------------------------------------------------------------------------------------------------------------------------------------------------------------------------------------------------------------------|
| Laboratory animals      | <p>Drosophila melanogaster. Following strains were used:</p> <p>w-;DECADGFP : Obtained from Hong Lab</p> <p>w-;UAS-CD8::Cherry;Dpp-GAL4,Gal80ts : Obtained from Dahmann Lab, TU Dresden</p> <p>yw;vkg::GFP and w-;Ptc::Gal4,Gal80ts : Obtained from MPI_CBG Fly Facility</p> <p>w-;UAS-mmp2 : Obtained from Bloomington Stock Center (#58705)</p> <p>w-;UAS-Lin : Obtained from Bloomington Stock Center(#7074)</p> <p>w-;UAS-CDC42F89 : Obtained from Bloomington Stock Center(#6286)</p> <p>w-;UAS-CDC42L89 : Obtained from Bloomington Stock Center(#6289)</p> <p>w-;UAS-ykiGFP : Obtained from Bloomington Stock Center(#28815)</p> <p>w-;UAS-ykiS168A : Obtained from Bloomington Stock Center(#28818)</p> <p>w-;trol::GFP : Obtained from Bloomington Stock Center(#60214)</p> <p>w-;UAS-Stinger::GFP: : Obtained from Bloomington Stock Center (#84277)</p> <p>w-;Df(2R)trix/CyO : Obtained from Bloomington Stock Center(#1896)</p> <p>w-;Laminin-A::GFP : Obtained from Vienna Drosophila Stock Center (#318155)</p> <p>UAS-LamC: Obtained from the Wallrath Lab</p> <p>w-;LamCEX296/CyO: Obtained from the Wallrath Lab.</p> <p>w-;UAS-LamCRNAi: Obtained from National Institute Genetics (#10119R-1)</p> <p>w-;UAS-MMP2,Vkg::GFP : Generated in this work</p> <p>w-;CD8::Cherry; Ubx-GAL4: Generated in this work</p> |
| Wild animals            | The study did not involve wild animals                                                                                                                                                                                                                                                                                                                                                                                                                                                                                                                                                                                                                                                                                                                                                                                                                                                                                                                                                                                                                                                                                                                                                                                                                                                                                            |
| Field-collected samples | The study did not involve field collected samples                                                                                                                                                                                                                                                                                                                                                                                                                                                                                                                                                                                                                                                                                                                                                                                                                                                                                                                                                                                                                                                                                                                                                                                                                                                                                 |
| Ethics oversight        | No ethical approval or guidance was required as the study used only Drosophila melanogaster                                                                                                                                                                                                                                                                                                                                                                                                                                                                                                                                                                                                                                                                                                                                                                                                                                                                                                                                                                                                                                                                                                                                                                                                                                       |

Note that full information on the approval of the study protocol must also be provided in the manuscript.
